# Supplementary material for: Optical DNA Biosensor Based on Square-Planar Ethyl Piperidine Substituted Nickel(II) Salphen Complex for Dengue Virus Detection
Source: MDPI journal article supplement (doi:10.3390/s18041173), 2018-04-12
Supplement: s1 [file s1]

## Supplementary Material

a)

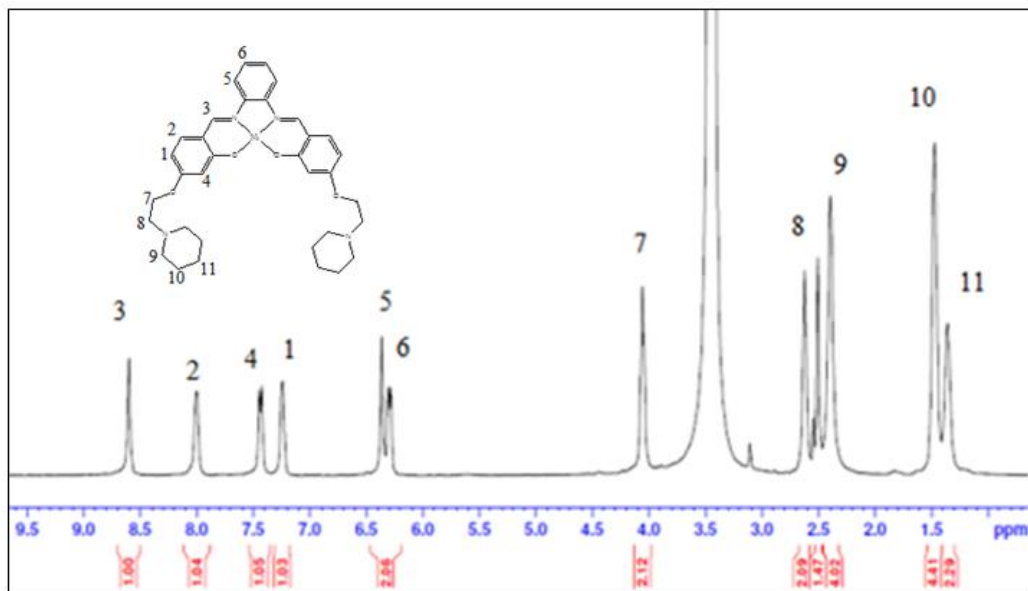

b)

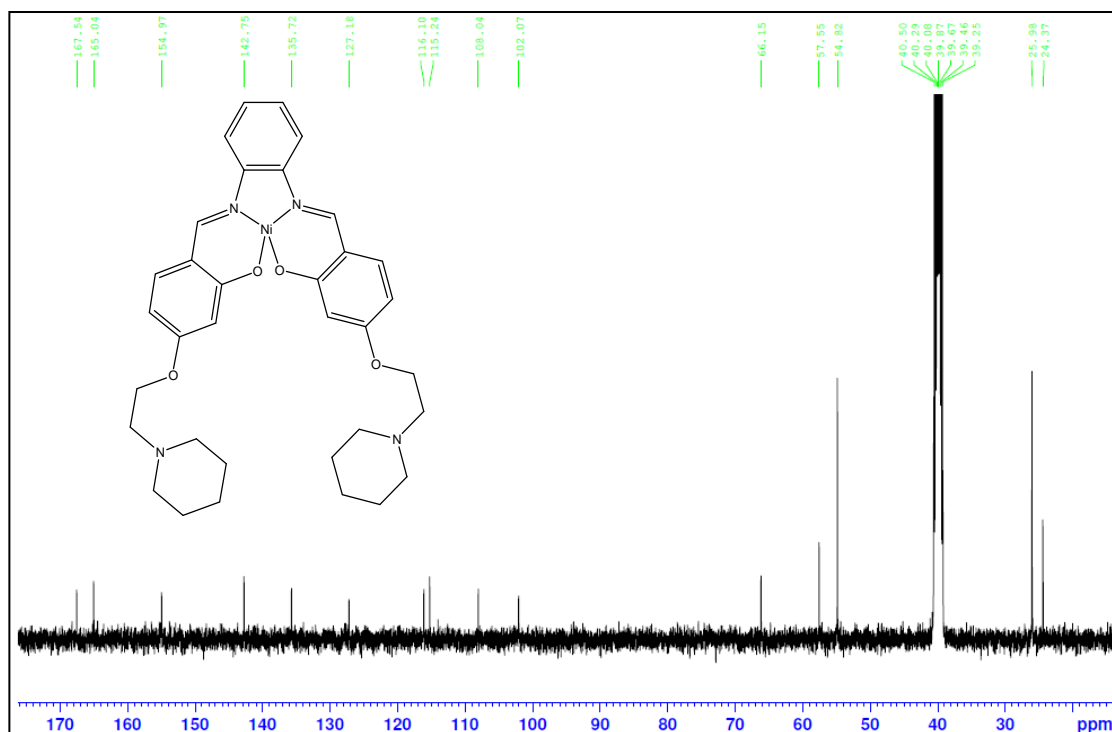

**Figure S1.** <sup>1</sup>H NMR spectrum (a) and <sup>13</sup>C NMR spectrum (b) of the ethyl piperidine substituted nickel(II) salen complex in DMSO-*d*<sub>6</sub>.

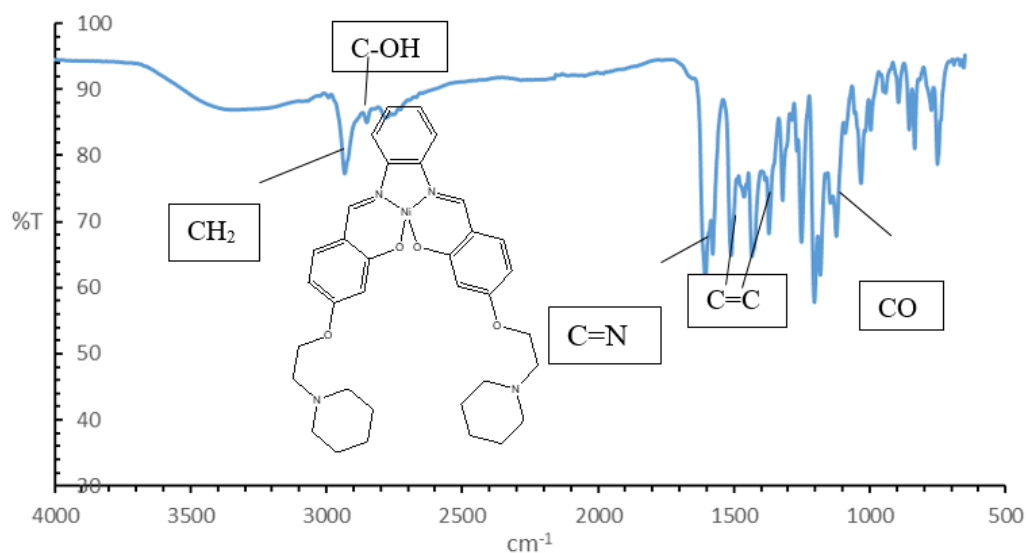

**Figure S2.** Infra-red spectrum of the as-synthesized nickel(II) salphen complex with piperidine side chain.

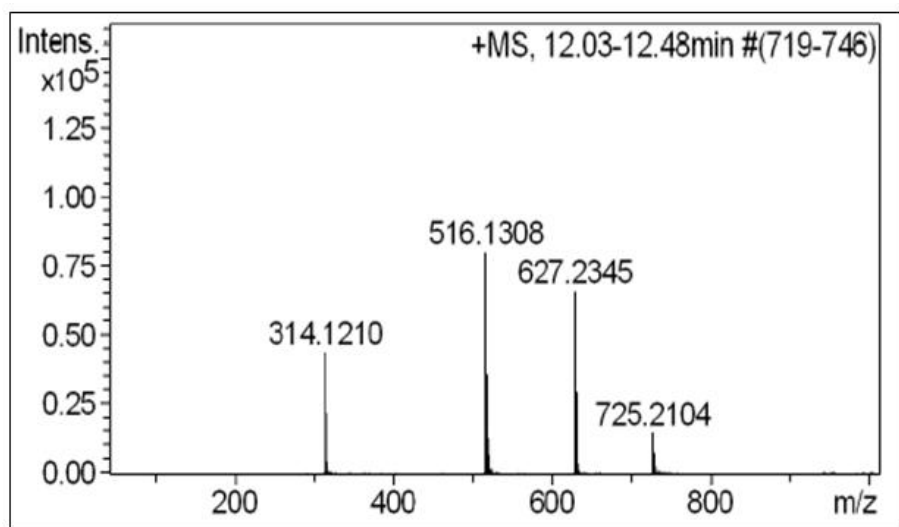

**Figure S3.** Mass spectrum for the nickel(II) salphen complex with piperidine side chain.

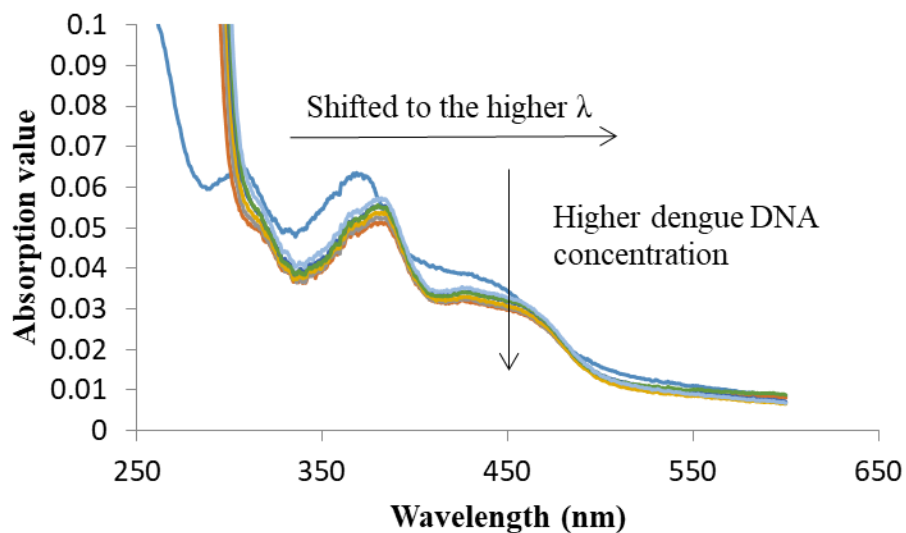

**Figure S4.** UV-Vis spectra for the titration of ethyl piperidine substituted nickel(II) salphen (30  $\mu\text{M}$ ) complex binding to dsDNA using cDNA concentration from  $6 \times 10^{-6} \text{ M}$ – $1.8 \times 10^{-5} \text{ M}$ .

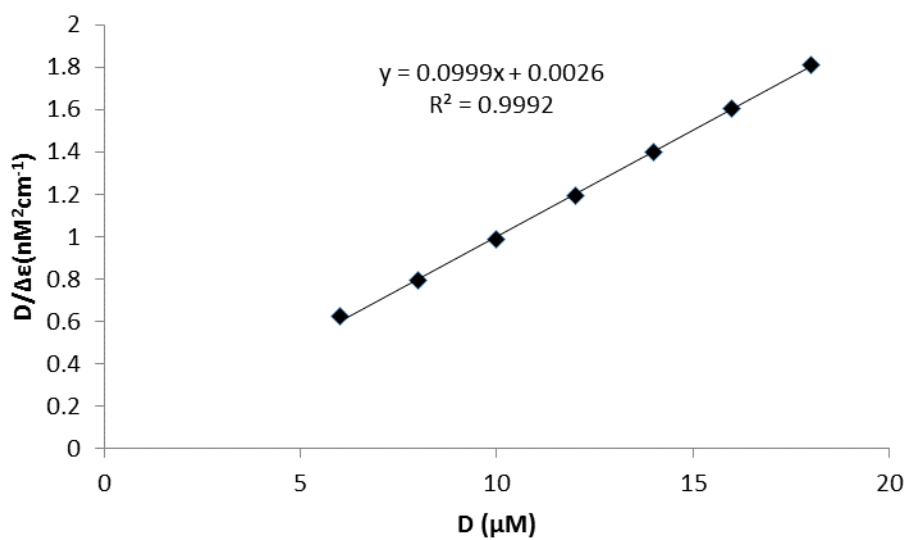

**Figure S5.** The Scatchard plot linear binding.
